# Supplementary material for: Lactobacillus plantarum 24-7 improves postoperative bloating and hard stools by modulating intestinal microbiota in patients with congenital heart disease: a randomized controlled trial
Source: Royal Society of Chemistry journal article supplement (doi:10.1039/d3fo05452g), 2024-01-01
Supplement: d3fo05452g3.xlsx [file d3fo05452g3.xlsx]

## Sheet: Sheet1
	PreP	PostP	PostLP	PreP	PostP	PostLP	PreP	PostP	PostLP	PreP	PostP	PostLP	PreP	PostP	PostLP	PreP	PostP	PostLP	PreP	PostP	PostLP	PreP	PostP	PostLP	PreP	PostP	PostLP	PreP	PostP	PostLP	PreP	PostP	PostLP
	Bacteroidetes			Firmicutes			Proteobacteria			Actinobacteria			Euryarchaeota			Verrucomicrobia			TM7			Tenericutes			Fusobacteria			Cyanobacteria			Others
	0.579624	0.911173	0.895904	0.155632	0.035528	0.0661938	0.260191	0.0130789	0.0329795	0.00383387	0.00720782	0.00468738	0	0.0317537	0	0	0	0	9.856e-05	0	0	0	0	0	0.00047307	0.00110083	0	0	0	2.237e-05	0.00014784	0.00015726	0.00021255
	0.763996	0.91746	0.957539	0.217125	0.0781187	0.0337509	0.00053269	0.00314893	0.00495481	0.0181328	0.00109583	0.00282267	0	0	0	0	0	0	0	8.817e-05	6.057e-05	0	0	0	0	0	0.00041189	0	0	0.00046035	0.00021308	8.817e-05	0
	0.833401	0.00070333	0.805205	0.161783	0.114408	0.128727	0.00152564	0.884456	0.00879912	0.0029423	0.00019743	0.0572369	4.359e-05	0	0	0	0	0	3.269e-05	0	0	0	0	0	0	0	0	0	0	0	0.00027244	0.00023444	3.196e-05
	0.684753	0.730848	0.826849	0.27038	0.237679	0.0603243	0.0006901	0.00167127	0.0756393	0.0439832	0.0297238	0.00332092	0	0	0.00042144	0	0	0.0332007	5.391e-05	2.243e-05	0.00016015	0	0	0	0	0	0	2.157e-05	0	3.371e-05	0.00011861	5.608e-05	5.057e-05
	0.920798	0.367598	0.871462	0.0649355	0.589638	0.116401	0.00435302	0.0401408	0.0021403	0.00942575	0.00206125	0.00259586	2.322e-05	9.369e-05	0	2.322e-05	0	0.0073664	3.482e-05	4.015e-05	0	0	0	0	0	0.00025431	0	0.0002902	0	0	0.00011608	0.000174	3.438e-05
	0.243081	0.764209	0.607161	0.479126	0.221631	0.338614	0.122233	0.0096802	0.0253229	0.155319	0.00222999	0.0287481	0	0	0	0	0.00186509	0.00012652	0.0001487	0	0	0	0	0	0	0.00025341	0	0	0	0	9.294e-05	0.00013177	2.711e-05
	0.567103	0.786245	0.607499	0.364739	0.204747	0.174633	0.0619653	0.00484592	0.215021	0.00587761	0.00160288	0.00284697	0	0	0	0	0.0020999	0	6.531e-05	3.728e-05	0	0	0	0	0.00011973	9.94e-05	0	0	0	0	0.00013061	0.00032306	0
	0.759233	0.793183	0.804129	0.195976	0.196698	0.186373	0.00709144	0.00622231	0.00862255	0.0356388	0.00381912	0.00075705	0	2.598e-05	0	0	0	0	4.272e-05	2.598e-05	0	0	0	0	0.00193306	0	0	0	0	1.966e-05	8.544e-05	2.598e-05	9.832e-05
	0.0300532	0.352584	0.80888	0.42711	0.618671	0.171919	0.54111	0.0260599	0.00174951	0.00061909	0.00230745	0.00732402	3.258e-05	0	0	0	0	0	0.0001412	0	0	0	0	0	0.0008146	0	0	0	0	0.0100515	0.00011947	0.00037806	7.607e-05
	0.727015	0.324046	0.159877	0.207347	0.257462	0.591319	0.0265777	0.224176	0.0005203	0.0375925	0.192572	0.231668	0	0	0	0	0	0.00013284	0.00018891	0.00169375	0.015908	0	0	0	0.00100266	2.455e-05	0.00050923	0	0	6.642e-05	0.00027609	2.455e-05	0
	0.673494	0.645636	0.951107	0.309932	0.253984	0.0257983	0.00795008	9.568e-05	0.00054376	0.00844576	0.100202	0.00611727	1.906e-05	0	0.0017219	0	0	0.0144851	2.542e-05	0	0.00010573	0	0	0	1.271e-05	0	9.063e-05	6.99e-05	0	0	5.084e-05	8.201e-05	3.021e-05
	0.93113	0.83779	0.522458	0.0271641	0.153099	0.346102	0.0269259	0.00300335	0.0490013	0.0139393	0.00602114	0.0820541	0.00071448	0	0	0	0	0.00038528	4.203e-05	0	0	0	0	0	0	0	0	2.802e-05	0	0	5.604e-05	8.664e-05	0
	0.851768	0.827449	0.757482	0.038285	0.156401	0.176577	0.0962544	0.00139377	0.00666583	0.0135903	0.0146346	0.0564152	0	0	0	0	0	0.00245419	7.649e-05	0	0.00027038	0	0	0	0	0	9.359e-05	0	2.212e-05	0	2.55e-05	9.956e-05	4.16e-05
	0.719682	0.443067	0.975754	0.142463	0.347263	0.0222031	0.0992234	0.0878052	0.00095238	0.0362547	0.120759	0.00078026	0	0	0	2.232e-05	0	0	0.0003794	0.00033068	0	0	0	0	0.00183003	9.3e-05	0.00026391	3.348e-05	0	2.295e-05	0.00011159	0.00068202	2.295e-05
	0.835567	0.889738	0.933634	0.159273	0.0970021	0.0347556	0.00112219	0.0124542	0.0128977	0.00403767	0.00065787	0.0179203	0	0	0	0	0	0.00053639	0	0	0	0	0	0	0	0	0	0	0	0.000256	0	0.00014745	0
	0.760253	0.741584	0.774063	0.186977	0.194124	0.168478	0.0135256	0.0496407	0.00026	0.0373222	0.00332147	0.0564063	0	6.681e-05	0	0	0.00999303	0	0.00040093	0	0.00075399	0	0	0	7.075e-05	0.00107852	0	0.00086083	0	3.9e-05	0.00058961	0.00019089	0
	0.843206	0.698096	0.865945	0.145389	0.126976	0.11436	0.0047076	0.148258	0.00487602	0.00647295	0.00492695	0.003104	0	0.0215715	0.011524	0	0	0	0	0	0	0	0	0	4.203e-05	0	0.00014271	0	0	0	0.00018214	0.00017137	4.757e-05
	0.022812	0.719033	0.842386	0.2516	0.25519	0.138696	0.723607	0.00256617	0.00067953	0.00162111	0.0229919	0.017722	0	0	0	0	0	0.00031711	0	0.00011507	0.00011778	0	0	0	5.298e-05	0	6.342e-05	0	0	0	0.00030727	0.00010357	1.812e-05
	0.941006	0.647116	0.746452	0.0265334	0.258054	0.247245	0.00510061	0.0604359	0.00028365	0.0273347	0.00302377	0.00144975	0	0	0	0	0.0304051	0.00454884	0	0	2.101e-05	0	0	0	0	0.00057127	0	0	0	0	2.544e-05	0.00039398	0
	0.5394	0.303848	0.422673	0.427945	0.565127	0.33078	0.00344337	0.0440138	0.239903	0.0290837	0.0369522	0.00664368	0	0.0477014	0	2.846e-05	0.00110248	0	0	0.00011405	0	0	0	0	0	0.00010455	0	0	3.802e-05	0	9.96e-05	0.00099794	0
	0.840837	0.022332	0.882312	0.0707284	0.855963	0.0968626	0.0117813	0.0630402	0.00189857	0.0765989	0.0495307	0.0180483	0	2.397e-05	0	0	0	0.00067637	0	0.00034763	0.00011866	0	0	0	0	0.00026372	5.933e-05	0	9.59e-05	0	5.386e-05	0.00840296	2.373e-05
	0.957944	0.350922	0.896109	0.0398703	0.590659	0.089162	0.00076566	0.0546946	0.0103555	0.00075174	0.00269461	0.00396346	0	0	0	0.00066822	0	0	0	0.00010778	2.103e-05	0	0	0	0	7.186e-05	0.00030488	0	0	5.257e-05	0	0.0008503	3.154e-05
	0.669228	0.89783	0.736999	0.170988	0.0359855	0.24558	0.150269	0.0596543	0.00066849	0.00897871	0.00352775	0.0166712	0.00035339	8.545e-05	0	0	0	0	5.235e-05	0	0	0	0	0	2.618e-05	0.00277093	0	0	0	8.186e-05	0.00010471	0.00014648	0
	0.479351	0.923237	0.967337	0.348061	0.0736047	0.014591	0.171931	0.00165068	0.013152	0.00060367	0.00150771	0.00364388	0	0	3.868e-05	0	0	0	5.327e-05	0	0	0	0	0	0	0	0.00113726	0	0	3.868e-05	0	0	6.189e-05
	0.413975	0.748202	0.982415	0.429824	0.189347	0.0155714	0.0843708	0.0540042	0.00052691	0.0122475	0.00758932	0.00139199	0.0276629	0	0	0.00439862	0	5.505e-05	3.027e-05	7.504e-05	2.359e-05	0.0270979	0	0	4.035e-05	0.00062172	0	0	0	0	0.0003531	0.00016079	1.573e-05
	0.866633	0.703573	0.987089	0.113691	0.206516	0.0110137	0.0145913	0.0609551	0.00157906	0.00463516	0.00548015	0.0003178	0	0.0233835	0	0	0	0	0.00010642	0	0	0.00014189	0	0	7.095e-05	0	0	7.095e-05	0	0	5.912e-05	9.288e-05	0
	0.676011	0.847483	0.80982	0.210923	0.141527	0.181287	0.0639663	0.0104846	0.00429541	0.0483842	0.00034717	0.00441912	0	0	0	0.00016588	0	0	0	0	0	0.00040433	0	0	0.00010367	0	0	0	0	0.00013058	4.147e-05	0.00015871	4.811e-05
	0.710065	0.471779	0.981973	0.275569	0.178823	0.0131772	0.00255636	0.190737	0.00255588	0.0115881	0.15513	0.00226813	0	0	0	0	0	2.539e-05	0.00017958	0.00292506	0	0	0	0	0	0.00024751	0	0	2.25e-05	0	4.225e-05	0.00033751	0
	0.954158	0.00373471	0.877884	0.0260568	0.196418	0.113353	0.00616703	0.797959	0.00275066	0.013439	0.0010176	0.00342032	0	0	0	4.48e-05	0	0	0	5.245e-05	0	0	0	0	4.48e-05	0	0	0	0.00013638	0.00239782	8.959e-05	0.0006819	0.00019442
	0.557191	0.840444	0.69839	0.42884	0.0950384	0.188594	0.0107785	0.0175945	0.00166796	0.00054611	0.0469229	0.106246	0	0	0	0.00229941	0	0.00025593	0.00018683	0	0.00465088	0	0	0	4.311e-05	0	5.295e-05	0	0	7.943e-05	0.00011497	0	6.178e-05
	0.913372	0.620204	0.952163	0.0777652	0.232453	0.0328568	0.00113664	0.076768	0.0029795	0.00522313	0.0705507	0.00245274	0	0	0.0095311	0.0024086	0	0	0	0	1.646e-05	0	0	0	0	0	0	0	0	0	9.472e-05	2.414e-05	0
	0.804082	0.828466	0.949134	0.120581	0.150316	0.0340118	0.0338	0.00321455	0.00770548	0.00361539	0.0178359	0.00687003	0.0367847	0	2.762e-05	6.758e-05	0	0.00200232	0	2.399e-05	1.381e-05	0.00074335	0	0	0	0	0.00017261	0	0.00014393	2.071e-05	0.00032662	0	4.143e-05
	0.962091		0.940782	0.0324019		0.0568273	0.00134951		0.0011138	0.0035578		0.00122285	0		0	0		0	0.00029989		0	0		0	0		0	0.00020447		2.337e-05	9.542e-05		3.116e-05
	0.37663		0.934378	0.60933		0.0306882	0.00126141		0.00968664	0.0126966		0.0217576	0		1.662e-05	0		0.00343934	5.894e-05		0	0		0	0		0	0		0	2.358e-05		3.323e-05
	0.836443			0.100292			0.00799356			0.0551738			7.322e-05			0			0			0			0			0			2.441e-05
	0.824771			0.158865			0.00191844			0.013943			0.00017129			0			3.426e-05			0			0.00021697			5.71e-05			2.284e-05
	PreP	PostP	PostLP	PreP	PostP	PostLP	PreP	PostP	PostLP	PreP	PostP	PostLP	PreP	PostP	PostLP	PreP	PostP	PostLP	PreP	PostP	PostLP	PreP	PostP	PostLP	PreP	PostP	PostLP	PreP	PostP	PostLP	PreP	PostP	PostLP	PreP	PostP	PostLP	PreP	PostP	PostLP	PreP	PostP	PostLP	PreP	PostP	PostLP	PreP	PostP	PostLP	PreP
	Bacteroides			Parabacteroides			Prevotella			Alistipes			Streptococcus			Faecalibacterium			[Prevotella]			Bifidobacterium			Blautia			[Eubacterium]			[Ruminococcus]			Coprococcus			Gemmiger			Dorea			Lactobacillus			Paraprevotella			Collinsella
	0.539364	0.30037	0.398986	0.022747	0.140277	0.47696	3.942e-05	0.291117	0.0150019	0.00216826	0.0174429	0	0.00159663	0	0.0037141	0.00734251	0.00471785	0.0349372	0	0.114316	2.237e-05	0.00102499	0	0.00375885	0.00432666	0.00056352	0.00478806	0	0.010104	0.00222622	0.0446069	0.00015726	0.00266252	0.00298628	0.0002621	0.00321069	0.00778601	0.00039315	0	0.0043168	2.621e-05	0.00102921	0	9.174e-05	0	0.0103091	0.0178623	0	0.00223725
	0.483865	0.453282	0.521697	0.00010654	0.168077	0.207618	0.274581	0.0114747	0.035035	0.00051138	0.105703	0.0799796	0.00333465	0.00015115	0.00431275	0.0743957	0.00459744	0.00308919	2.131e-05	3.779e-05	0.0191166	0	0.00046604	0.00054515	0.0235023	0.00031489	0.00020595	0	0.00483676	0.00053304	0.0144253	0.00610893	0.00145373	0.0515432	0.00100766	0.00140528	0.00250365	0	0.00065418	0.00623249	0.00226723	0.00038766	4.262e-05	0	0.00078744	0	0	0.00450658	0.0181115
	0.631951	0.00023444	0.673719	0.0620716	8.637e-05	0.0374442	0.00770446	0	0.00015979	0.0724786	4.936e-05	0.0610612	0.00064295	0.00219636	0.00344082	0.0774042	0	0.0369116	0	0	6.392e-05	9.808e-05	0	0.0557349	0.00665831	0.00012339	0.00149138	0.00010897	0	0.00420781	0.00108974	0	0.00138485	0.00258268	0	0.0105462	0.00456601	0	0	0.00406473	0	0.00094809	0.00051218	0	0.0001811	0	0	3.196e-05	0.00254999
	0.524035	0.314153	0.561605	0.03416	0.140375	0.224271	5.391e-05	0.0352873	0	0.0954928	0.223478	0.0006153	0.00094889	0.0111941	0.00085973	0.118169	0.0013572	0.00045515	0	0	0	0.0428726	0.0246203	0.00103673	0.0366508	0.00939947	0.0005563	0.00185465	0.0171052	0.00325349	0.00706276	0.0298809	0.0230357	0.0158184	0.0432061	0.0005563	0.0339336	0	0.00074173	0.00300841	0.00121139	0.00074173	5.391e-05	0	0.00337992	0	3.365e-05	0.000177	0
	0.296424	0.32035	0.330878	0.0896607	0.0278536	0.143219	0.264641	0.00058893	0.0248756	0.143801	0.00024093	0.146486	0.00175282	0.445016	0.00956687	0.0073363	0.0328729	0.0214545	0	0	0.00027506	0.0007197	8.031e-05	0.00085096	0.00399317	0.0906146	0.00336946	0.0001509	2.677e-05	0.00055012	0.00040628	0.00211479	0.00103147	0.0109116	0.00074954	0.00701398	0.00154387	0.00033462	0.00023208	0.0011492	0.00033462	0.0007822	0.00012769	0	0.0394709	3.482e-05	0.0173198	0.132466	0.00774258
	0.00355025	0.269951	0.270129	0.00063198	0.420303	0.0998906	0.232002	0.0039329	0.171241	0.00011153	0.0699711	0.0478441	0.153906	0.00191577	0.00032535	0.00557631	0.0579798	0.0104111	0	0	0.00290101	0.136285	0.00160154	0.021735	0.0168498	0.00916325	0.00369631	0.0553821	0.00532158	0.00469946	0.00727709	0.0200497	0.00675999	0.0181695	0.00394303	0.00015364	0.0148795	0.0691399	0	0.00521385	0.00054736	0.00509711	0	0.00362881	0.00543149	0	0	0	0.0174539
	0.360679	0.225298	0.54996	0.0617041	0.429175	0.0568126	7.619e-05	0.00149105	0	0.0163158	0.130244	9.221e-05	0.00122995	0.00217445	0.00713471	0.0895574	0.034257	0	0	0	0	0.00512659	0.00085736	0	0.0277772	0.0113072	0	0.00045715	0.00781561	0.0202976	0.018656	0.0196074	0.0456206	0.0193961	0.00448559	0.00013831	0.0462046	0.0806039	0	0.0212683	0.0007331	0.0342673	0	0.00643638	0.00054173	0.0896663	0	5.763e-05	0
	0.59802	0.610164	0.492695	0.0410748	0.117769	0.24797	0.0762116	0.0564165	8.849e-05	0.0296901	0.0030527	0.0506047	0.00105731	0.00444265	0.00894701	0.0738834	0.0418805	0.062108	0	0	3.933e-05	0.00087575	0	0.00039327	0.0109469	0.0655616	0.00159276	0.00044856	0.00706668	0.00269393	0.0104022	0.00346839	0.0111788	0.00122819	0.0222782	0.00023596	0	0.00153285	0.00081605	0.00522246	0.0074434	0.00840625	0	0.00076642	0.00079638	0	9.093e-05	2.95e-05	0.0346562
	0.0297057	0.292395	0.206768	2.172e-05	0.0383532	0.15877	0	7.822e-05	0.242073	0	0.00016947	0.0684915	0.00811339	0.5082	0.00559624	0	0.0326693	0.0422815	0	0	0.0748049	0	0	0	0	0.0652083	0.00262969	0	0	0.00122791	0	0.00136883	0.00416187	0	0.00061271	0.00741095	0	0.0004302	0.00377067	0.140295	0	0.00845413	0.00017378	0	0	0	0.0206497	0.0100624	0
	0.627708	0.18905	0.138478	0.0981734	0.129621	0.0191184	0.00013078	0.00364525	0.00042067	8.719e-05	0.00074869	0	0.00467908	0.0464799	0.291779	0.012526	0.0271	0.00037639	0	0	0	0.037171	0.180753	0.1626	0.0361684	0.0222151	0.0991343	0.0197916	0.0209141	0.00867909	0.0403534	0.0626319	0.0107935	0.00055219	0.00408709	0.00226941	0	0.00011046	0.00037639	0.0165802	0.00629633	0.0001107	0.00031969	3.682e-05	0.00676394	0	0	0	0
	0.211297	0.415872	0.518714	0.0865103	0.00042372	0.227291	0.239748	0.221522	0.157312	0.0197386	0.00105246	0.0151648	0.00146164	0.00351275	0.00093647	0.0689324	0.0882015	0.00374588	0	6.834e-05	0.00028698	0.00122651	0	0.00569435	0.0327663	0.0336924	0.0048485	0.0216705	5.467e-05	0.0013896	0.00327281	0.0219786	0.00015104	0.0378757	0.0510784	0.00042292	0.0116995	0.0033624	0.0020693	0.00850296	0.0061644	0	2.542e-05	0	0.0003625	0	0	0.0198623	0.0045311
	0.459772	0.384313	0.203326	0.123058	0.329531	0.132272	0.0002942	0.00054869	0.100507	0.132024	0.0942012	0.0524688	0.00012608	0.00135728	0.00017236	0.00032221	0.0180345	0.00619487	5.604e-05	0	0.00819223	0.00602401	0.0025413	0.0131907	0.00949833	0.00449059	0.00379195	0.00021014	0.00047649	0.0226199	0.00077051	0.00479381	0.00635709	0.0023956	0.00076528	0.00023319	4.203e-05	0	0	0.0025497	0.00108294	0.0105749	0	0.0242723	0.00649904	0	0	8.111e-05	0.00771914
	0.851016	0.606613	0.0936545	0.00020398	0.0240813	0.0107735	0.00029323	0	0.459287	3.825e-05	0.16566	0.0218901	0.00821031	0.0007522	0.00410765	0.00161911	0.0492799	0.0620203	0	0	0.12897	0.0133099	0.0137054	0.0234084	0.0006247	0.0217252	0.00496038	0.0006247	0.00144908	0.00024958	0.0168796	0.00478972	0.00041596	0	0.00748877	0.00503317	0	0.0384615	0.0011647	0	0.00057521	0.00422204	0.00274102	6.637e-05	6.239e-05	0	0	0.0070402	0
	0.678528	0.437693	0.53471	0.0315122	0.00029968	0.219151	0.00012275	0.0011367	0.080218	5.579e-05	8.267e-05	0.0533104	0.0207218	0.0158002	0.00183592	0.00046867	0.011057	0.00245554	3.348e-05	0	0.014171	0.0362547	0.117577	0.00033276	0.0511069	0.00572486	0.00022949	0.0001897	0.00264542	0.00024096	0.0252299	0.00227341	0.00075731	0	0	0.00064257	0	0	0.00075731	0.00350384	0.00179806	0.00024096	0.00024549	0.164522	0.00042456	0	9.3e-05	0.00356856	0
	0.018175	0.467702	0.475472	0.00868044	0.172873	0.114178	0.808304	0.00453705	8.533e-05	8.801e-05	0.109921	0.233512	0.00027505	0	0.00079239	0.0496953	0.00556923	0.00190174	0	0	0	0.0023874	0.00019282	0.00079239	0.00404867	0.00062384	0.00269414	0	0.00961855	0.00018286	0.00621603	0.00750882	0.00079239	0.00188131	0.00086204	0.0170182	0	0	0	0.0160187	0.00247269	0.00162136	6.601e-05	0.00039699	0	0	2.269e-05	0	0.00165027
	0.508467	0.259867	0.645026	0.0485956	0.349126	0.126566	0.00020047	0.00318784	5.2e-05	0.101825	0.129241	0.000156	0.00411547	0.0132572	0.0236857	0.0471451	0.0187453	0.00061099	0.00010613	0	0	0.0363789	0.00189934	0.0489314	0.0149996	0.00656658	0.0434585	0.00011792	0.012465	0.00601893	0.00716964	0.0203106	0.0080859	0.0144926	0.00563122	0.00061099	0.0322162	0.0278889	0.000195	0.00457536	0.00012408	0.00111799	0	0.00960171	0.00471894	7.075e-05	0	0	0.00036556
	0.174896	0.326057	0.291526	0.100653	0.126633	0.236511	0.399333	0.199231	0.00476898	0.0449043	0.0221391	0.269703	0.00444139	0.00267769	0.0312303	0.0132401	0.0280515	0.0032705	0.0380391	0	0.0019623	0.00354471	8.569e-05	0.00049949	0.00271808	0.00533396	0.00542308	0.00011209	0.0106037	0.00155795	0.00072856	0.00946832	0.0013082	0.00189145	0.00456279	0.00770649	0.00226973	0.0079581	0	0.00120492	0.00167088	0.00235476	0.0023538	4.284e-05	0.0162574	0.00260599	0.00032132	0.00027353	0.00276011
	0.00821149	0.385167	0.11262	0.0114007	0.319862	0.0144241	0.00161051	0.0001496	0.433221	0.00029667	0.0137514	0.0243633	0.0656283	0.00196778	0.0014859	8.476e-05	0.00649022	0.068161	7.417e-05	0	0.210762	3.179e-05	0.0228999	0.0159009	0	0.00176064	0.00434897	0.0483153	0.0119102	0.00030805	0	0.0385731	0.00072483	0	0.00019563	0.00456642	0	6.904e-05	0.00211106	0.00021191	0.0109781	0.00732076	6.357e-05	0.124568	0	3.179e-05	0	0.00977612	3.179e-05
	0.932064	0.220833	0.283489	0.00541861	0.363039	0.181271	0.00260755	0.00271844	0.00694408	0.00010176	0.0604162	0.172667	0.00568572	0.00771208	0.00798412	0.00223867	0.0255395	0.124741	0.00026711	0	0	0.0171589	0.00164485	0.0005883	0.0057366	0.00926829	0.0150017	0	0.0198367	0.00064083	0.0037396	0.0271056	0.00229018	0.00262027	0.00712112	0.015611	0	0.0715067	0.00080892	0	0.00067961	0.00172289	0.00145005	0.00668774	0.026274	7.632e-05	0	0.0245302	0.00998499
	0.277803	0.0450402	0.388541	0.0299089	0.109469	0.0318714	0.169878	0.124581	0.00125568	0.00933409	0.0143228	0.00027397	0.0154667	0.00072232	0.0153878	0.0188389	0.196717	0.00028538	0	0.00060827	0.00055935	0.0277604	0.00920954	6.849e-05	0.0181986	0.0464089	0	0.0002988	0.0483762	0.0403187	0.00933409	0.017022	0.0692564	0.0150683	0.00617771	0.00036529	0	0.0138571	0	0.00092487	0.0236749	0.0683774	0	8.554e-05	0.00045661	0	0	0	0.00011383
	0.177945	0.00414754	0.122849	0.116629	0.00056339	0.01825	0.39895	5.994e-05	0.436244	0.0336475	0.0002757	0.0343166	0.00092904	0.0940268	0.00150699	0.0255554	0.00016782	0.0364169	0.0522014	0	0.214752	0	0.041835	0.0063958	0.00477986	0.00574182	0.0025512	0.00071361	0.00219364	0.00015426	0.00014811	0.0177769	0.00034412	0.00358153	0.00080314	0.00322757	0.00076747	0	0.00049837	0.004726	0.00043154	0.00280039	0	0	8.306e-05	0.0250034	0	0.00777227	0.0318029
	0.243412	0.295976	0.394643	0.152019	0.0376647	0.229555	0.246474	0	0.0294578	0.0474851	0	0.0908231	6.961e-05	0.497425	0.00828436	0.00996756	0.028491	0.00697022	0.0104548	0	0.0207109	0.00058469	0	0.00113542	0.00206033	0.0505509	0.00117747	0.00116938	0	0.00063079	6.961e-05	0.00179641	0.00129312	0.00226915	0.00033533	0.00354293	0.00116938	0.00019162	0.00132466	0.00030627	0	0.00083054	0	3.593e-05	0.00179775	0	0.0160838	0.011575	0.00013921
	0.208644	0.734064	0.0835334	0.236417	0.0999121	0.0888813	0.0788843	0.00043944	0.347258	0.110467	0.0133175	0.0153888	0.0697093	6.103e-05	0.0101501	0.0159811	0.0019897	0.0970259	0.00956769	0	0.185812	0.00433229	0.000354	0	0.00412287	0.00115964	0.00197817	0.00013088	8.545e-05	0.00058663	0.00066751	0.00665267	0.00281037	0.00104708	0.00085447	0.00432469	0	0.00148922	0.00562074	0.00155753	0.00214839	0.00274216	0.0413989	0	0	0.00145282	0.0300164	0.00368349	0.00392655
	0.317851	0.467415	0.569698	0.160745	0.320713	0.208211	2.663e-05	0.00064987	0.083461	0.00053265	0.0994047	0.0366631	0.00186428	0.00022096	0.00182581	0.00287632	0.0193273	0.001145	0	0	0.0157592	0.00044388	0.00041592	0.00036361	0	0.00445814	0.00016247	0.0479386	0.00029894	0.00046419	0.0169916	0.00506902	0.00071175	0	0.00019496	0.0001702	0	0	0.00026304	0	0.00107879	0.00011605	0	0.00418519	0.00032493	0	0	0.00117594	0
	0.179284	0.506373	0.133765	0.0406671	0.0772867	0.0239234	0.00487278	0.153619	0.516783	0.0744033	0.00492019	0.0295228	0.0042372	0.00814673	0.00055837	0.0599564	0.033959	0.00637799	0	0	0.231857	0.00143258	0	0.00098304	0.0197736	0.025823	0.00016515	0.0774298	0.00177942	0	0.00579084	0.00125417	0	0.00935211	0.0127239	0.00044827	0.0245556	0.00563839	7.864e-05	0.0113698	0.0120593	0.00020447	0	0.00231539	0	0.0031779	0	0.00648023	0.00809104
	0.139516	0.275169	0.480699	0.0183633	0.174912	0.48923	0.531104	0.167226	0.0118876	0.00580577	0.0432955	0	0.00024831	0.00631611	0.00048663	0.0172873	0.0296764	0.00593884	0.133438	0	0.00012911	0.00011824	0.00018577	0.00013904	0.0029561	0.0220948	0.00090374	0.0370576	0.00271685	4.966e-05	0.00034291	0.00587491	0.00055615	0.00179731	0.0239176	0.00029794	0.0043159	0.0272614	0	0.00287333	0.00536405	8.938e-05	0	0	0	0.0128413	0.00029026	0	0.00269596
	0.142851	0.377484	0.11689	0.0211182	0.182463	0.139426	0.363737	0.0532163	0.330994	0.00673875	0.109279	0.0240543	0.00073608	0	0.0130855	0.0303244	0.00798492	0.0441569	0.101579	2.976e-05	0.173397	0.00012441	0.00015871	0	0.00558798	0.00031741	0.00075599	0.0229325	0.00468184	0.0001512	0.00072571	0.0351733	0.00077661	0.00432317	0.00143828	0.00347069	0.00895736	0	0.0011065	0.00452015	0.0201657	0.00152573	0	0	0	0.0150015	0	0.00348444	0.0260323
	0.249604	0.28786	0.567278	0.451905	0.17358	0.18707	6.338e-05	0.00625513	0.00228506	0	0.00158628	0.170694	0.00297889	0.0319282	0.00022851	0.0940887	0.0137815	0.00168417	0	0	0.00011002	0.0111233	0.145218	0.00056703	0.0244121	0.0101477	0.00085478	0.00111973	0.0225792	7.617e-05	0.00440496	0.0316582	0.00118484	0.0252361	0.00288006	0.00351222	0.0138276	0	0	0.00106691	0.0046351	0.00038931	0.013743	7.875e-05	7.617e-05	0	0	0	0
	0.670519	0.00185686	0.131823	0.13124	0.0012484	0.123203	4.48e-05	5.245e-05	0.377459	0.125401	0.00036718	0.0344408	0.00188147	0.00376618	0.00525649	0.00064209	0.00018883	0.0244751	0	0	0.17718	0.00144843	0.00052454	0	0.00261315	0	0.00049685	0.00014932	7.344e-05	7.201e-05	0.00220998	9.442e-05	0.00089288	0.00542042	0	0.0021818	0.00017919	0	0.00120251	0.00122445	0	0.00113771	0	0.00017834	0	4.48e-05	2.098e-05	0.00511247	0.0117069
	0.439763	0.36329	0.526811	0.111019	0.212365	0.165799	8.623e-05	0.0545018	0.00172091	0.00067545	0.184922	0.00027358	0.0080192	0.00541171	0.0972183	0.00369343	0.00048731	0.00030888	0	0.00010259	0.00066189	7.186e-05	0.00562972	0.0806534	0.0426685	0.00078226	0.0195919	0.00393774	0.02266	0.0179857	0.0133941	0.00874594	0.00269168	0.00684075	0.00250067	0.00077662	0.0121438	0	0.00018533	0.0754351	0.00030778	0	5.749e-05	0	0.00240045	0	0	5.295e-05	0
	0.643934	0.611621	0.263011	0.120213	0.00028974	0.243784	0.00104192	0.00276457	0.00648576	0.00020297	0.00010865	0.380495	0.00013531	0.00807639	0.0153172	0.00851127	0.00642248	0.00024692	0.00027063	0	0.00199182	0.0002165	0.0690658	0.00049384	0.00209737	0.00220924	0.00105352	0.00020297	0.00322331	0.00023046	0.0016373	0.00059154	0.00018931	0.00595383	0	0.00219759	0.00993207	0.00024145	0	0.00322048	0.00053118	0.00053499	0	0.109146	0.0062553	0.0480366	0	5.761e-05	0.00423534
	0.33907	0.65945	0.158094	0.0591753	0.0173921	0.0198506	0.200209	0.00025189	0.457199	0.0250712	0.130357	0.0412961	0.00010137	0.00127143	0.0010564	0.00594682	0.0478584	0.00887925	0.00795161	0	0.221422	0.00132902	0.0170083	0.00216112	0.00183585	0.0148013	0.00083545	0.0154189	0.00173921	8.976e-05	0.00175701	0.00460592	9.666e-05	0.00578914	0.00489379	0.00141543	0.00095735	0.0385506	0.00019333	0.00111503	0.00037183	0.00095283	0	0.00057574	4.143e-05	0.0110039	3.598e-05	0.0116135	0.00157681
	0.430712		0.18701	0.381897		0.139591	0.14377		0.337264	2.726e-05		0.0571388	0.00128135		0.00183816	0.00512541		0.00873128	0		0.174517	0.00245365		0	0.00607961		0.00032713	0.00035442		0.0001402	0.00040894		0.00038165	0.00455289		0.00130852	0		0.00056858	0.00028626		0.00062311	0		0	5.453e-05		0.00626222	0
	0.240928		0.11339	0.0326079		0.0218489	0.0993327		0.484938	0.00135572		0.0329645	0.00198052		0.00049845	0.0066489		0.00451932	4.716e-05		0.231889	0.00014147		0.00192736	0.0109518		0.00023261	0.446538		6.646e-05	0.00254639		6.646e-05	0.00680216		0.00053169	0		9.969e-05	0.00865301		0.0003323	3.537e-05		0	0.00190979		0.00697006	0.0120482
	0.0704409			0.0149864			0.734138			0.00046375			0.00025628			0.0201486			0			0.00131802			0.00823763			0.00096411			0			0.00146447			0.0140711			0.00551616			0			0.00445442			0.0535141
	0.704959			0.105469			0.00173573			0.00010277			0.00548127			0.0254422			0.00049103			0.00248941			0.013509			0.00243231			0.00613217			0.0559888			0.00423656			0.00358566			0			6.852e-05			0.00825616
[truncated: 29 more columns]
