# Supplementary material for: Lactobacillus plantarum 24-7 improves postoperative bloating and hard stools by modulating intestinal microbiota in patients with congenital heart disease: a randomized controlled trial
Source: Royal Society of Chemistry journal article supplement (doi:10.1039/d3fo05452g), 2024-01-01
Supplement: d3fo05452g9.pdf [file d3fo05452g9.pdf]

## Supplementary materials

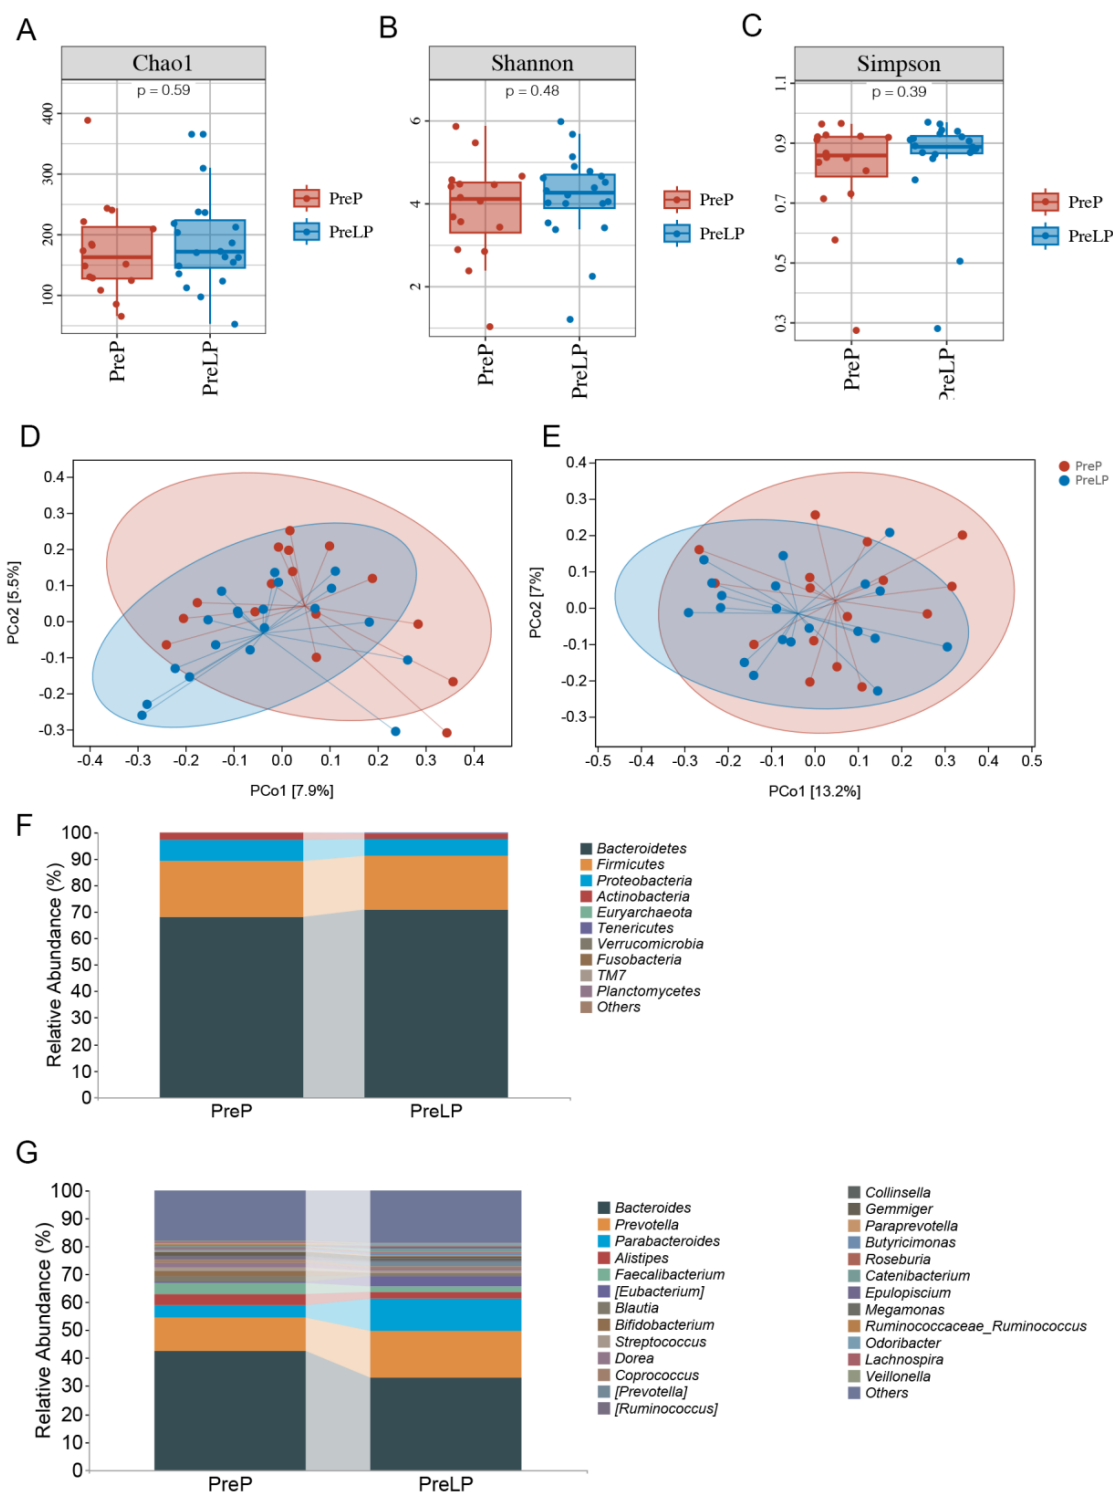

**Supplementary figure 1: There were no significant differences in the diversity and composition of the preoperative intestinal microbiota of CHD patients. (A) The Chao1 index. (B) The Shannon index. (C) The Simpson index. (D) PCoA of  $\beta$ -diversity based on the Jaccard distance. (E) PCoA of  $\beta$ -diversity based on the unweighted UniFrac. (F) Species composition at the phylum level. (G) Species composition at the genus level. PreP, Preoperative**

placebo group; PreLP, Preoperative *Lactobacillus plantarum* group.

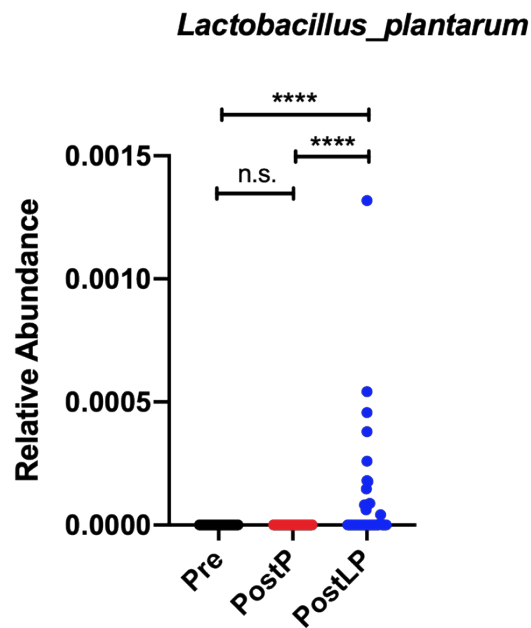

Supplementary figure 2: Relative abundance of *Lactobacillus plantarum* in the faeces of postoperative patients.

Pre, Preoperative group; PostP, Postoperative placebo group; PostLP, Postoperative *Lactobacillus plantarum* group. \*\*\*\* $p < 0.0001$ .

Supplementary Table 1: Gastrointestinal symptom scores in preoperative patients.

| Variables          | Placebo Group (n=57) | Probiotics Group (n=55) | t/Z/ $\chi^2$ | P-value |
|--------------------|----------------------|-------------------------|---------------|---------|
| GSRs total score   | 0 (0-0)              | 0 (0-0)                 | -0.288        | 0.773   |
| Pain/discomfort    | 0 (0-0)              | 0 (0-0)                 | -0.361        | 0.718   |
| Heartburn          | 0 (0-0)              | 0 (0-0)                 | -0.982        | 0.326   |
| Reflux             | 0 (0-0)              | 0 (0-0)                 | 0.000         | 1.000   |
| Nausea             | 0 (0-0)              | 0 (0-0)                 | -1.446        | 0.148   |
| Abdominal gurgling | 0 (0-0)              | 0 (0-0)                 | 0.000         | 1.000   |
| Bloating           | 0 (0-0)              | 0 (0-0)                 | -0.290        | 0.771   |
| Belching           | 0 (0-0)              | 0 (0-0)                 | -1.018        | 0.309   |
| Flatulence         | 0 (0-0)              | 0 (0-0)                 | -1.018        | 0.309   |
| Constipation       | 0 (0-0)              | 0 (0-0)                 | 0.000         | 1.000   |
| Diarrhea           | 0 (0-0)              | 0 (0-0)                 | 0.000         | 1.000   |
| Loose stools       | 0 (0-0)              | 0 (0-0)                 | 0.000         | 1.000   |
| Hard stools        | 0 (0-0)              | 0 (0-0)                 | -0.496        | 0.620   |
| Urgency            | 0 (0-0)              | 0 (0-0)                 | 0.000         | 1.000   |
| Incomplete         | 0 (0-0)              | 0 (0-0)                 | 0.000         | 1.000   |

|                   |         |         |       |       |
|-------------------|---------|---------|-------|-------|
| <b>evacuation</b> |         |         |       |       |
| <b>Tiredness</b>  | 0 (0-0) | 0 (0-0) | -1.05 | 0.294 |

**Supplementary Table 2: Preoperative and intraoperative variables of included patients.**

| <b>Variables</b>                            | <b>Placebo Group (n=57)</b> | <b>Probiotics Group (n=55)</b> | <b>t/Z/χ<sup>2</sup></b> | <b>P-value</b> |
|---------------------------------------------|-----------------------------|--------------------------------|--------------------------|----------------|
| <b>NT-proBNP, ng/L</b>                      | 52.00 (50.00-122.00)        | 50.00 (50.00-184.50)           | -0.33                    | 0.741          |
| <b>HbA1c, %</b>                             | 5.30 (5.10-5.50)            | 5.20 (5.10-5.50)               | -0.738                   | 0.461          |
| <b>STB, μmol/L</b>                          | 12.80 (8.70-16.60)          | 11.30 (8.70-15.90)             | -0.623                   | 0.533          |
| <b>Cr, μmol/L</b>                           | 62.30 (54.8-77.30)          | 66.20 (58.6-86.40)             | -2.226                   | 0.026          |
| <b>WBC count, ×10<sup>9</sup>/L</b>         | 5.76 (4.97-6.84)            | 5.50 (4.68-7.48)               | -0.012                   | 0.991          |
| <b>RBC count, ×10<sup>12</sup>/L</b>        | 4.50±0.64                   | 4.48±0.60                      | -0.202                   | 0.840          |
| <b>Platelet count, ×10<sup>9</sup>/L</b>    | 210.68±59.86                | 218.38±59.62                   | 0.679                    | 0.498          |
| <b>Hemoglobin, g/L</b>                      | 133.77±17.23                | 131.98±18.24                   | -0.53                    | 0.597          |
| <b>Neutrophil count, ×10<sup>9</sup>/L</b>  | 3.25 (2.61-4.26)            | 3.25 (2.86-4.28)               | -0.227                   | 0.820          |
| <b>Lymphocyte counts, ×10<sup>9</sup>/L</b> | 1.75 (1.44-2.10)            | 1.71 (1.37-2.27)               | -0.08                    | 0.937          |
| <b>Monocyte count, ×10<sup>9</sup>/L</b>    | 0.44 (0.33-0.50)            | 0.43 (0.32-0.47)               | -0.856                   | 0.392          |
| <b>Right atrial diameter, mm</b>            | 42.60±9.20                  | 42.33±9.12                     | -0.156                   | 0.877          |
| <b>Left atrial diameter, mm</b>             | 32 (30-39)                  | 33 (30-38)                     | -0.694                   | 0.488          |
| <b>Pulmonary artery diameter, mm</b>        | 25 (22-28)                  | 25 (21-30)                     | -0.318                   | 0.750          |
| <b>LVEF, %</b>                              | 64 (58-67)                  | 65 (59-70)                     | -0.697                   | 0.486          |
| <b>Operative time, h</b>                    | 3.50 (2.00-4.50)            | 3.25 (2.00-4.50)               | -0.277                   | 0.782          |

|                                                |            |            |       |       |
|------------------------------------------------|------------|------------|-------|-------|
| <b>Intraoperative blood transfusion, n (%)</b> | 20 (35.10) | 17 (30.90) | 0.221 | 0.638 |
|------------------------------------------------|------------|------------|-------|-------|

Data are presented as n (%), mean  $\pm$  standard deviation or median (interquartile range). NT-proBNP, N-Terminal Pro-Brain Natriuretic Peptide; HbA1c, Glycated hemoglobin A1c; STB, Serum total bilirubin; Cr, Creatinine; WBC, White blood cell; RBC, Red blood cell; LVEF, Left ventricular ejection fraction.

**Supplementary Table 3: Postoperative adverse events in included patients.**

| <b>Variables</b>         | <b>Placebo Group (n=57)</b> | <b>Probiotics Group (n=55)</b> | <b>t/Z/<math>\chi^2</math></b> | <b>P-value</b> |
|--------------------------|-----------------------------|--------------------------------|--------------------------------|----------------|
| <b>Insomnia</b>          | 4 (7.00)                    | 5 (9.10)                       | 0.003                          | 0.955          |
| <b>Fever</b>             | 5 (8.80)                    | 3 (5.40)                       | 0.099                          | 0.753          |
| <b>Cough</b>             | 4 (7.00)                    | 1 (1.80)                       | 0.765                          | 0.382          |
| <b>Rehospitalization</b> | 1 (1.80)                    | 0 (0.00)                       | -                              | 1.000          |

**Supplementary Table 4: Indicators related to gastrointestinal symptoms in postoperative patients.**

| <b>Variables</b>          | <b>Placebo Group (n=57)</b> | <b>Probiotics Group (n=55)</b> | <b>t/Z/<math>\chi^2</math></b> | <b>P-value</b> |
|---------------------------|-----------------------------|--------------------------------|--------------------------------|----------------|
| <b>GSRS total score</b>   | 7 (3.5-9.5)                 | 4 (3-7)                        | -1.833                         | 0.067          |
| <b>Pain/discomfort</b>    | 1 (0-1)                     | 0 (0-1)                        | -0.241                         | 0.809          |
| <b>Heartburn</b>          | 0 (0-0)                     | 0 (0-0)                        | -0.278                         | 0.781          |
| <b>Reflux</b>             | 0 (0-1)                     | 0 (0-1)                        | -0.889                         | 0.374          |
| <b>Nausea</b>             | 1 (0-1)                     | 1 (0-2)                        | -0.304                         | 0.761          |
| <b>Abdominal gurgling</b> | 0 (0-0)                     | 0 (0-0)                        | -0.794                         | 0.427          |
| <b>Bloating</b>           | 1 (0-1)                     | 0 (0-1)                        | -2.842                         | 0.004          |
| <b>Belching</b>           | 0 (0-0)                     | 0 (0-0)                        | -0.082                         | 0.934          |
| <b>Flatulence</b>         | 0 (0-1)                     | 0 (0-1)                        | -0.603                         | 0.546          |

|                                 |           |           |        |       |
|---------------------------------|-----------|-----------|--------|-------|
| <b>Constipation</b>             | 1 (0-1)   | 0 (0-1)   | -1.946 | 0.052 |
| <b>Diarrhea</b>                 | 0 (0-0)   | 0 (0-0)   | -0.624 | 0.533 |
| <b>Loose stools</b>             | 0 (0-0)   | 0 (0-0)   | -0.152 | 0.879 |
| <b>Hard stools</b>              | 1 (0-1)   | 0 (0-1)   | -2.174 | 0.030 |
| <b>Urgency</b>                  | 0 (0-0)   | 0 (0-0)   | -1.255 | 0.209 |
| <b>Incomplete evacuation</b>    | 0 (0-0)   | 0 (0-0)   | -1.052 | 0.293 |
| <b>Tiredness</b>                | 0 (0-0)   | 0 (0-0)   | -0.071 | 0.943 |
| <b>Time of first stool, d</b>   | 3 (1.5-3) | 2 (2-4)   | -0.422 | 0.673 |
| <b>Antiemetics use, n (%)</b>   | 17 (29.8) | 16 (29.1) | 0.007  | 0.932 |
| <b>Antidiarrheal use, n (%)</b> | 4 (7.0)   | 1 (1.8)   | 0.765  | 0.382 |
| <b>cathartics use, n (%)</b>    | 7 (12.3)  | 6 (10.9)  | 0.051  | 0.821 |
